# Supplementary material for: Inverse Vulcanization of a Natural Monoene with Sulfur as Sustainable Electrochemically Active Materials for Lithium-Sulfur Batteries
Source: MDPI journal article supplement (doi:10.3390/molecules26227039), 2021-11-22
Supplement: s1 [file s1]

# Supporting Information

## Inverse Vulcanization of a Natural Monoene with Sulfur as Sustainable

## Electrochemically Active Materials for Lithium-Sulfur Batteries

Jian Xiao <sup>a, b,\*,#</sup>, Zhicong Liu <sup>a</sup>, Wangnian Zhang <sup>c</sup>, Ning Deng <sup>c</sup>, Jijun Liu <sup>d</sup>

and Fulai Zhao <sup>b,\*,#</sup>

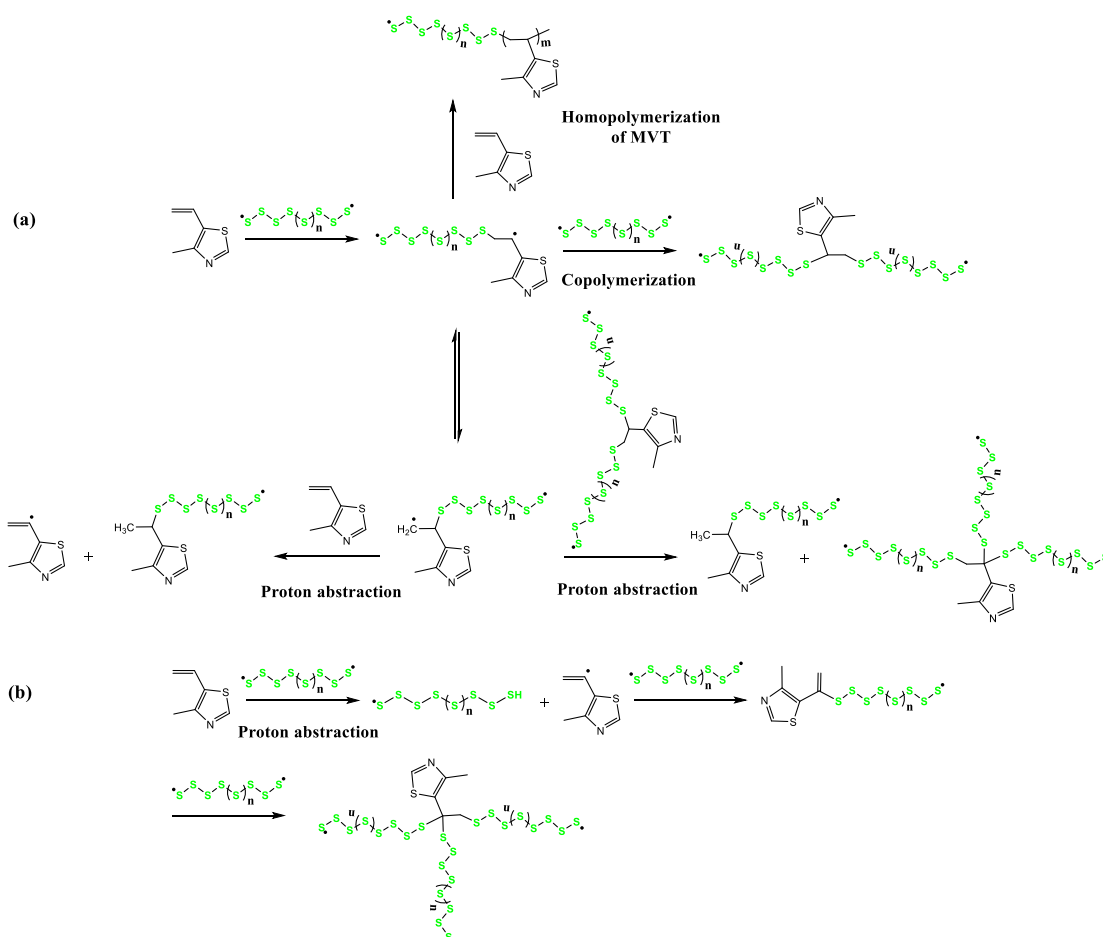

Figure S1 Proposed polymerization mechanism for poly(S-MVT) copolymer.

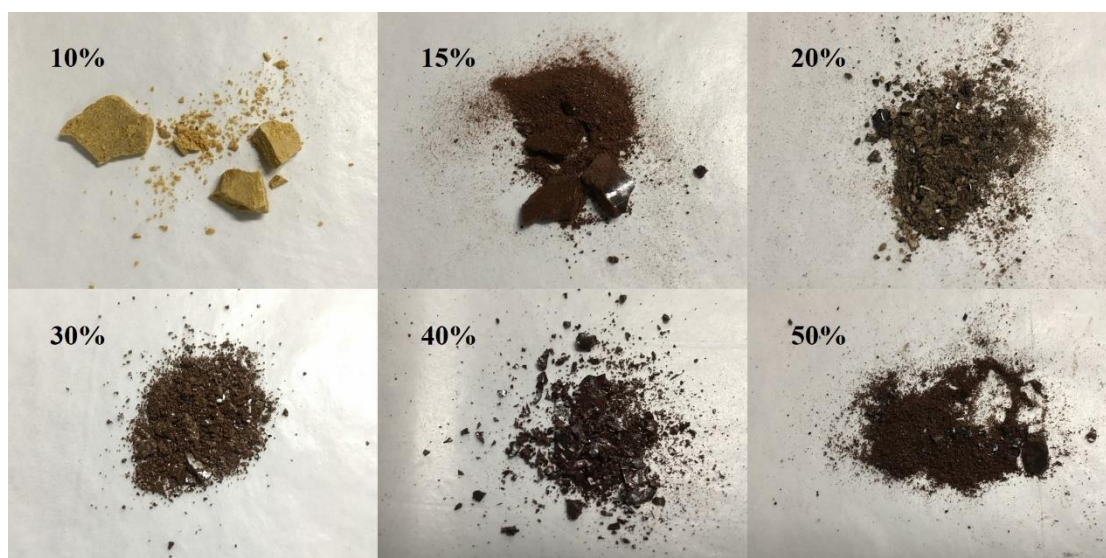

Figure S2 Photographs of poly(S-MVT) with different MVT content, MVT content stated above.

In order to test the solubility of the copolymer, we selected poly(S-MVT)s with MVT content of 10%, 30%, and 50% for testing. As shown in Figure S2, all the three poly(S-MVT)s have good solubility in THF and chloroform but can only partially dissolve in CS<sub>2</sub>.

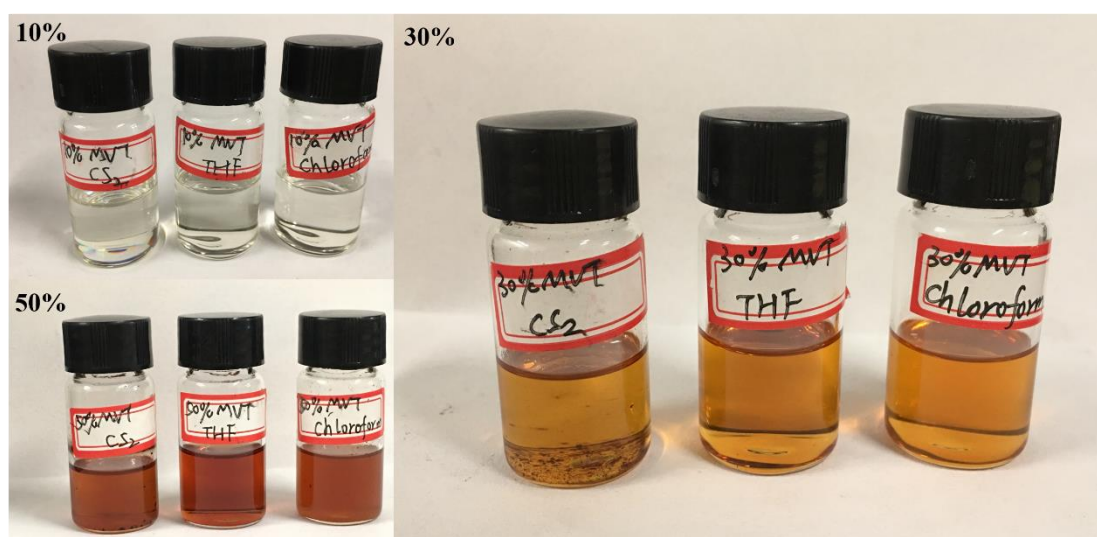

Figure S3 Photographs of poly(S-MVT)s in CS<sub>2</sub>, THF and chloroform, MVT content stated above.

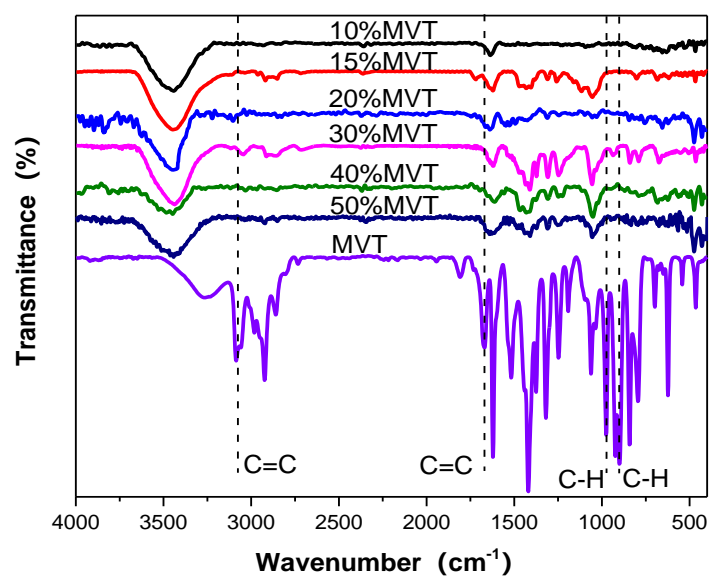

Figure S4 FT-IR spectra for MVT and all poly(S-MVT)s at different MVT content, MVT content stated above.

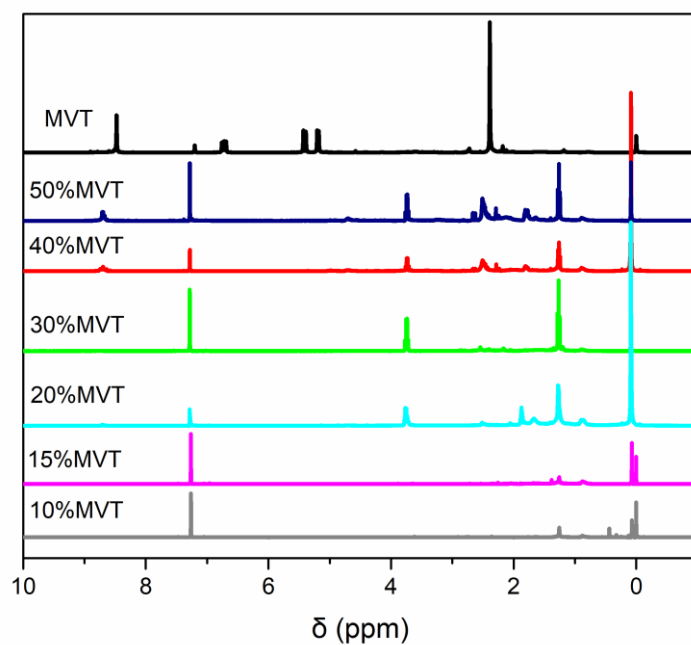

Figure S5 <sup>1</sup>H NMR spectra for MVT and all poly(S-MVT)s at different MVT content, MVT content stated above.

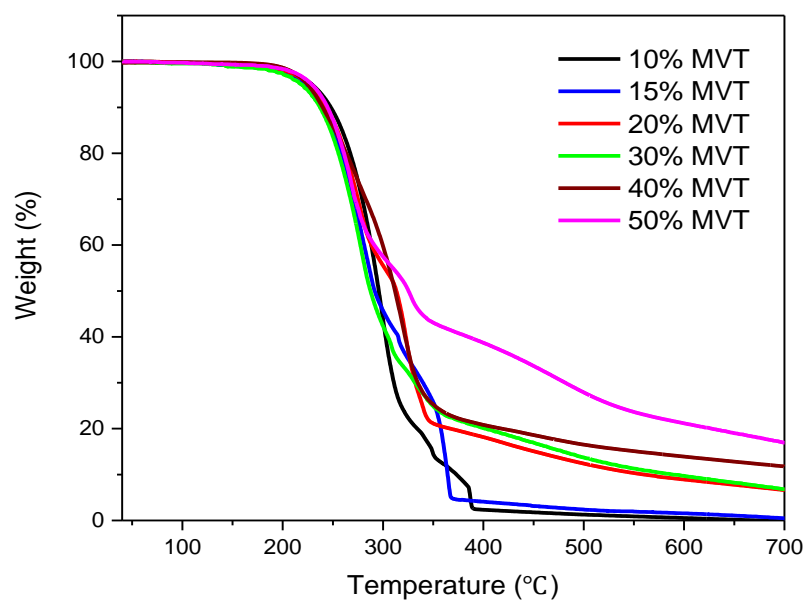

Figure S6 TGA curves of poly(S-MVT)s with different MVT content.

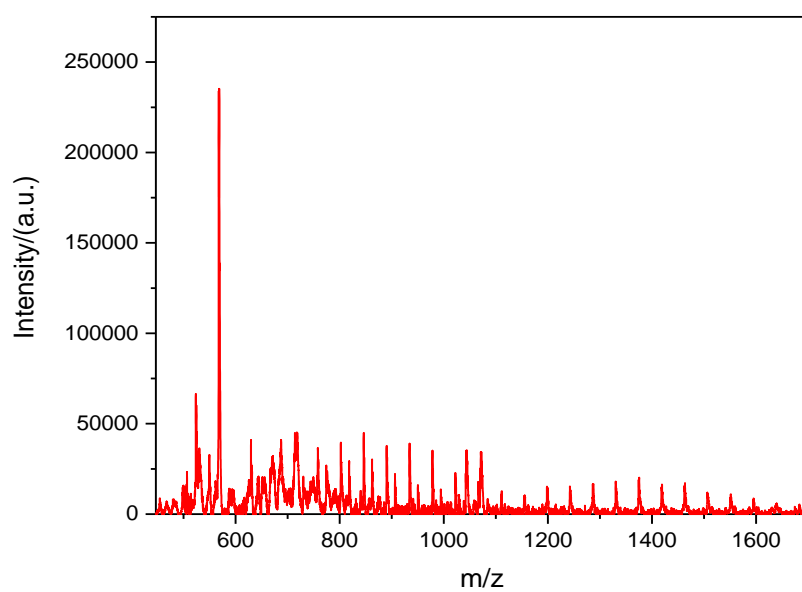

Figure S7 MALDI-TOF MS spectrum of poly(S-MVT) (50% MVT).

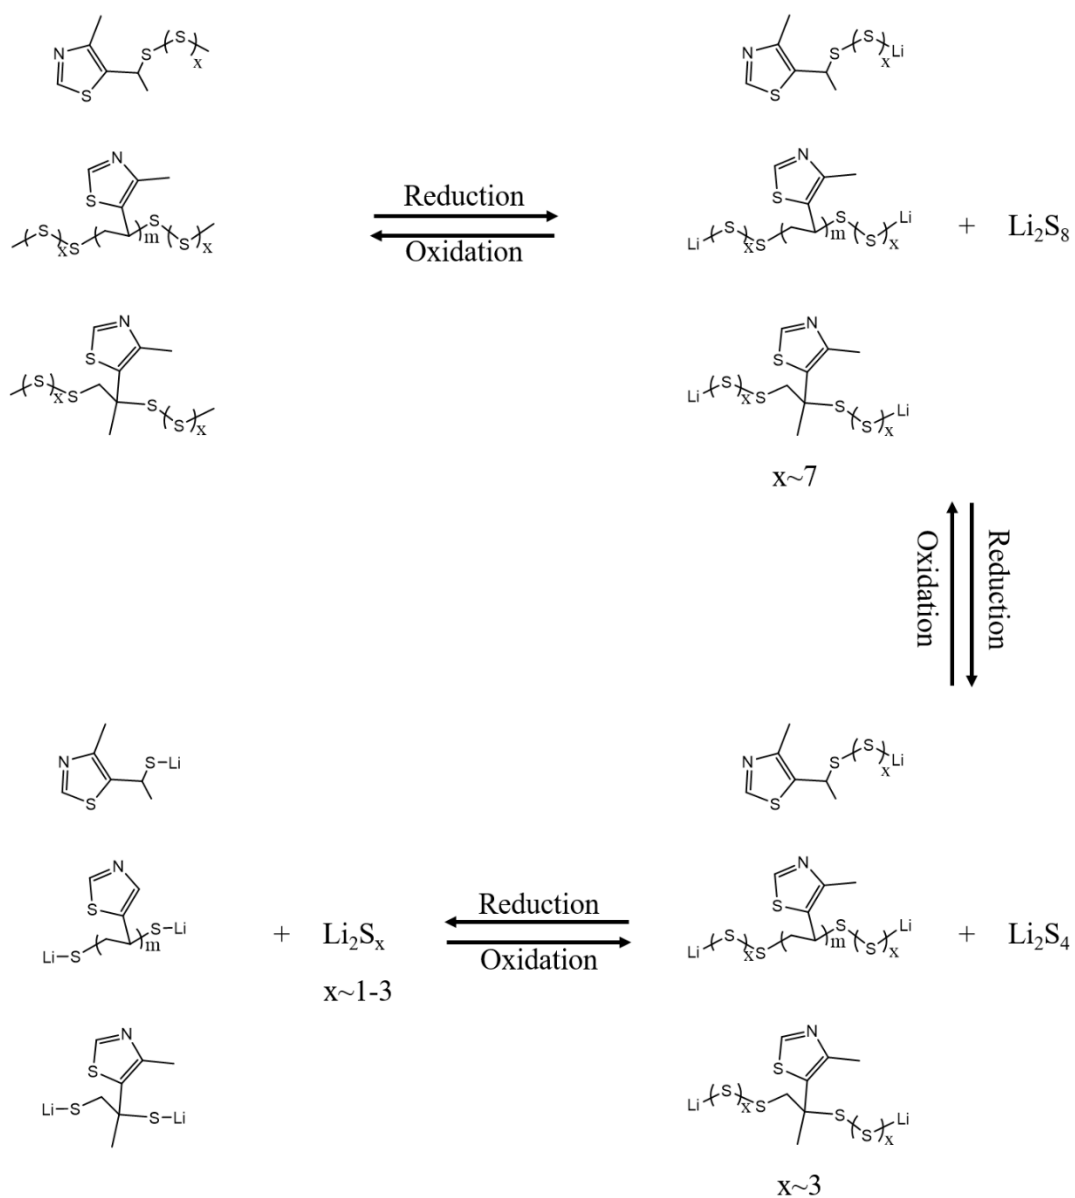

Figure S8 The possible electrochemical reactions of the poly(S-MVT) based cathode.

Table S1 Characteristics and electrode performance comparison of the present work with the recently reported literature.

| Sulfur-containing polymers                                                                                              | Monomer                                 |       | Renewable/<br>Sustainable | electrode performance                                                                                    | Reference |
|-------------------------------------------------------------------------------------------------------------------------|-----------------------------------------|-------|---------------------------|----------------------------------------------------------------------------------------------------------|-----------|
| poly(S-co-EAE)                                                                                                          | eugenol                                 | allyl | Yes                       | 557 mAh g <sup>-1</sup> based on S after 100 cycles at 0.1C                                              | [1]       |
| SVOCs                                                                                                                   | vegetable oil                           |       | Yes                       | 554 mAh g <sup>-1</sup> based on S after 100 cycles at 0.1C                                              | [2]       |
| Si-69 (C <sub>9</sub> H <sub>21</sub> O <sub>3</sub> SiS <sub>4</sub> SiO <sub>3</sub> H <sub>21</sub> C <sub>9</sub> ) | None                                    |       | No                        | 163 mAh g <sup>-1</sup> even after 200 cycles at 0.2 Ag <sup>-1</sup>                                    | [3]       |
| poly(S-Sty-P)                                                                                                           | styrene-peanut oil                      |       | No                        | 611 mAh g <sup>-1</sup> based on S after 100 cycles at 0.2C                                              | [4]       |
| poly-(S-r-p)p                                                                                                           | hexakis(styrene oxy)cyclotriphosphazene |       | No                        | 350 mAh g <sup>-1</sup> based on S after 100 cycles at 0.5C                                              | [5]       |
| poly(S-MVT)                                                                                                             | 4-Methyl-5-vinylthiazole                |       | Yes                       | 514 mAh g <sup>-1</sup> based on copolymer (605 mAh g <sup>-1</sup> based on S) after 100 cycles at 0.1C | This work |

[1] A. Hoeffling, T.N. Dan, Y.J. Lee, S.W. Song, P. Theato. A sulfur–eugenol allyl ether copolymer: a material synthesized via inverse vulcanization from renewable resources and its application in Li–S batteries. Mater. Chem. Front. 2017, 1,1818.

[2] Yamabuki, K., Itaoka, K., Shinchu, T., Yoshimoto, N., Ueno, K., Tsutsumi, H.. Soluble sulfur-based copolymers prepared from elemental sulfur and alkenyl alcohol as positive active material for lithium-sulfur batteries. Polymer 2017, 117: 225-230.

[3] Xing, C., Xue, P., Gu, X., Lai, C.. Communication—Organic Silane Coupling Agent Si-69: A New Organosulfur Cathode Material for Rechargeable Lithium Batteries. J. Electrochem. Soc. 2018, 165(16):A3782-A3784.

[4] Wang, J. and Zhang, S. A Novel Sulfur-Based Terpolymer Cathode Material for Lithium–Sulfur Battery. *Energy Technol.* 2020, 8(5), 2000057.

[5] Serkan Yeşilot, Sedat Küçükköylü, Emrah Demirb, Rezan Demir-Cakan. Phosphazene based star-branched polymeric cathode materials via inverse vulcanization of sulfur for lithium–sulfur batteries. *Polym. Chem.* 2020, 11, 4124-4132.
